# Supplementary material for: Personalized Medicine in Infant Population with Cancer: Pharmacogenetic Pilot Study of Polymorphisms Related to Toxicity and Response to Chemotherapy
Source: MDPI journal article supplement (doi:10.3390/cancers15051424), 2023-02-23
Supplement: s1 [file s1]

**Table S2.** SNPs panel. Information regarding drug agencies recommendation, drug labels and levels of evidence according to PharmGKB (accessed 2019). RNPGx: French National Network of Pharmacogenetics; EMA: European Medicines Agency; FDA: Food and Drug Administration; Sw: Swissmedic

| SNP         | Gene      | Wild type | Variant | Guides | Drug label |             | Level of evidence |           |
|-------------|-----------|-----------|---------|--------|------------|-------------|-------------------|-----------|
|             |           |           |         |        | Agency     | Status      | Adult             | Pediatric |
| rs1042522   | TP53      | C         | G       | NO     | NO         | X           | 3                 | X         |
| rs1045642   | ABCB1     | G         | A       | NO     | NO         | X           | 3                 | 3         |
| rs1051266   | SLC19A1   | C         | T       | NO     | NO         | X           | 3                 | X         |
| rs11045879  | SLC01B1   | C         | T       | RNPGx  | NO         | X           | 3                 | 3         |
| rs112445441 | KRAS      | G         | A       | NO     | NO         | X           | 3                 | X         |
| rs1127354   | ITPA      | C         | A       | NO     | NO         | X           | 3                 | 3         |
| rs1142345   | TPMT      | T         | C       | NO     | NO         | X           | 1A                | 1A        |
| rs11615     | ERCC1     | G         | A       | NO     | NO         | X           | 3                 | X         |
| rs116855232 | NUDT15    | C         | T       | NO     | EMA        | Processable | 1A                | 1A        |
| rs121434568 | EGFR      | G         | A       | NO     | FDA        | Required    | 1A                | X         |
| rs12248560  | CYP2C19   | C         | T       | NO     | NO         | X           | 3                 | X         |
| rs1517114   | C8orf34   | G         | C       | NO     | NO         | X           | 3                 | X         |
| rs16853826  | ATIC      | G         | A       | NO     | NO         | X           | 3                 | X         |
| rs1695      | GSTP1     | G         | A       | NO     | NO         | X           | 3                 | X         |
| rs1800460   | TPMT      | C         | T       | NO     | NO         | X           | 1A                | 1A        |
| rs1800462   | TPMT      | C         | G       | NO     | NO         | X           | NO                | X         |
| rs1800566   | NQO1      | G         | A       | NO     | NO         | X           | 3                 | X         |
| rs1800584   | TPMT      | C         | T       | NO     | NO         | X           | NO                | X         |
| rs1801019   | UMPS      | G         | C       | NO     | NO         | X           | NO                | X         |
| rs1801131   | MTHFR     | A         | C       | RNPGx  | NO         | X           | 3                 | 3         |
| rs1801133   | MTHFR     | A         | G       | RNPGx  | NO         | X           | 3                 | 3         |
| rs1801158   | DPYD      | G         | A       | NO     | NO         | X           | 1A                | X         |
| rs1801160   | DPYD      | G         | A       | NO     | NO         | X           | 1A                | X         |
| rs1801274   | FCGR2A    | A         | G       | NO     | NO         | X           | 3                 | X         |
| rs1801394   | MTRR      | A         | G       | NO     | NO         | X           | 3                 | 3         |
| rs2073618   | TNFRSF11B | G         | C       | NO     | NO         | X           | 3                 | X         |
| rs2228001   | XPC       | T         | G       | NO     | NO         | X           | 3                 | X         |
| rs2234693   | ESR       | T         | C       | NO     | NO         | X           | 3                 | X         |
| rs2299939   | PTEN      | C         | A       | NO     | NO         | X           | 3                 | X         |
| rs246240    | ABCC1     | A         | G       | NO     | NO         | X           | 3                 | X         |
| rs25487     | XRCC1     | C         | T       | NO     | NO         | X           | 2B                | X         |
| rs2612091   | ENOSF1    | C         | T       | NO     | NO         | X           | 3                 | X         |
| rs2699887   | PIK3CA    | C         | T       | NO     | NO         | X           | 3                 | X         |
| rs2740574   | CYP3A4    | A         | G       | NO     | NO         | X           | 3                 | X         |
| rs316019    | SLC22A2   | A         | C       | NO     | NO         | X           | 3                 | 3         |
| rs3212986   | ERCC1     | A         | C       | NO     | NO         | X           | 3                 | X         |
| rs3215400   | CDA       | C         | Del     | NO     | NO         | X           | 3                 | 3         |
| rs3740066   | ABCC2     | T         | C       | NO     | NO         | X           | 3                 | X         |
| rs3768142   | MTRR      | G         | T       | NO     | NO         | X           | 3                 | 3         |
| rs3892097   | CYP2D6    | C         | T       | NO     | NO         | X           | 1A                | X         |
| rs3918290   | DPYD      | C         | T       | RNPGx  | NO         | X           | 1A                | X         |
| rs396991    | FCGR3A    | A         | C       | NO     | NO         | X           | 3                 | X         |

|            |         |   |     |       |    |             |    |    |
|------------|---------|---|-----|-------|----|-------------|----|----|
| rs4124874  | UGT1A1  | T | C   | NO    | NO | X           | 3  | X  |
| rs4148323  | UGT1A1  | G | A   | NO    | Sw | Informative | 1B | X  |
| rs4149015  | SLC01B1 | G | A   | NO    | NO | X           | 3  | X  |
| rs4149056  | SLC01B1 | C | T   | NO    | NO | X           | 3  | 3  |
| rs4244285  | CYP2C19 | G | A   | NO    | NO | X           | 3  | X  |
| rs4673993  | ATIC    | C | T   | NO    | NO | X           | 2B | X  |
| rs4802101  | CYP2B6  | T | C   | NO    | NO | X           | 3  | X  |
| rs4880     | SOD2    | A | G   | NO    | NO | X           | 3  | X  |
| rs55886062 | DPYD    | A | C   | RNPGx | NO | X           | 1A | X  |
| rs602950   | CDA     | A | G   | NO    | NO | X           | 3  | X  |
| rs61886492 | FOLH1   | G | A   | NO    | NO | X           | 3  | 3  |
| rs67376798 | DPYD    | T | A   | RNPGx | NO | X           | 1A | X  |
| rs683369   | SLC22A1 | G | C   | NO    | NO | X           | 3  | X  |
| rs716274   | DYNC2H1 | A | G   | NO    | NO | X           | 3  | X  |
| rs75017182 | DPYD    | G | C   | NO    | NO | X           | 1A | X  |
| rs776746   | CYP3A5  | A | G   | NO    | NO | X           | 1A | 1A |
| rs7779029  | SEMA3C  | T | C   | NO    | NO | X           | 3  | X  |
| rs8187710  | ABCC2   | G | A   | NO    | NO | X           | 3  | X  |
| rs924607   | CEP72   | C | T   | NO    | NO | X           | 3  | 3  |
| rs2612091  | ENOSF1  | C | T   | NO    | NO | X           | 3  | X  |
| rs2699887  | PIK3CA  | C | T   | NO    | NO | X           | 3  | X  |
| rs2740574  | CYP3A4  | A | G   | NO    | NO | X           | 3  | X  |
| rs316019   | SLC22A2 | A | C   | NO    | NO | X           | 3  | 3  |
| rs3212986  | ERCC1   | A | C   | NO    | NO | X           | 3  | X  |
| rs3215400  | CDA     | C | Del | NO    | NO | X           | 3  | 3  |
| rs3740066  | ABCC2   | T | C   | NO    | NO | X           | 3  | X  |
| rs3768142  | MTRR    | G | T   | NO    | NO | X           | 3  | 3  |
| rs3892097  | CYP2D6  | C | T   | NO    | NO | X           | 1A | X  |
| rs3918290  | DPYD    | C | T   | RNPGx | NO | X           | 1A | X  |
| rs396991   | FCGR3A  | A | C   | NO    | NO | X           | 3  | X  |
| rs4124874  | UGT1A1  | T | C   | NO    | NO | X           | 3  | X  |
| rs4148323  | UGT1A1  | G | A   | NO    | Sw | Informative | 1B | X  |
| rs4149015  | SLC01B1 | G | A   | NO    | NO | X           | 3  | X  |
| rs4149056  | SLC01B1 | C | T   | NO    | NO | X           | 3  | 3  |
| rs4244285  | CYP2C19 | G | A   | NO    | NO | X           | 3  | X  |
| rs4673993  | ATIC    | C | T   | NO    | NO | X           | 2B | X  |
| rs4802101  | CYP2B6  | T | C   | NO    | NO | X           | 3  | X  |
| rs4880     | SOD2    | A | G   | NO    | NO | X           | 3  | X  |
| rs55886062 | DPYD    | A | C   | RNPGx | NO | X           | 1A | X  |
| rs602950   | CDA     | A | G   | NO    | NO | X           | 3  | X  |
| rs61886492 | FOLH1   | G | A   | NO    | NO | X           | 3  | 3  |
| rs67376798 | DPYD    | T | A   | RNPGx | NO | X           | 1A | X  |
| rs683369   | SLC22A1 | G | C   | NO    | NO | X           | 3  | X  |
| rs716274   | DYNC2H1 | A | G   | NO    | NO | X           | 3  | X  |
| rs75017182 | DPYD    | G | C   | NO    | NO | X           | 1A | X  |
| rs776746   | CYP3A5  | A | G   | NO    | NO | X           | 1A | 1A |
| rs7779029  | SEMA3C  | T | C   | NO    | NO | X           | 3  | X  |
| rs8187710  | ABCC2   | G | A   | NO    | NO | X           | 3  | X  |
| rs924607   | CEP72   | C | T   | NO    | NO | X           | 3  | 3  |
